# Supplementary material for: Catalytic ozonation of dichloromethane at low temperature and even room temperature on Mn-loaded catalysts
Source: Royal Society of Chemistry journal article supplement (doi:10.1039/d2ra05828f), 2022-01-01
Supplement: d2ra05828f1.pdf [file d2ra05828f1.pdf]

**Electronic Supplementary Information (ESI)**

**Catalytic ozonation of dichloromethane at low temperature and even room temperature on Mn-loaded catalysts**

**Yaxin Duan<sup>a</sup>, Peixi Liu<sup>a</sup>, Fawei Lin<sup>b</sup>, Yong He<sup>a</sup>, Yanqun Zhu<sup>a</sup>, Zhihua Wang<sup>a</sup>**

<sup>a</sup>*State Key Laboratory of Clean Energy Utilization, Zhejiang University, Hangzhou 310027, P.R. China*

<sup>b</sup>*School of Environmental Science and Engineering, Tianjin University, Tianjin 300072, P.R. China*

\*Corresponding authors.

E-mail Address: [wangzh@zju.edu.cn](mailto:wangzh@zju.edu.cn) (ZH. Wang)

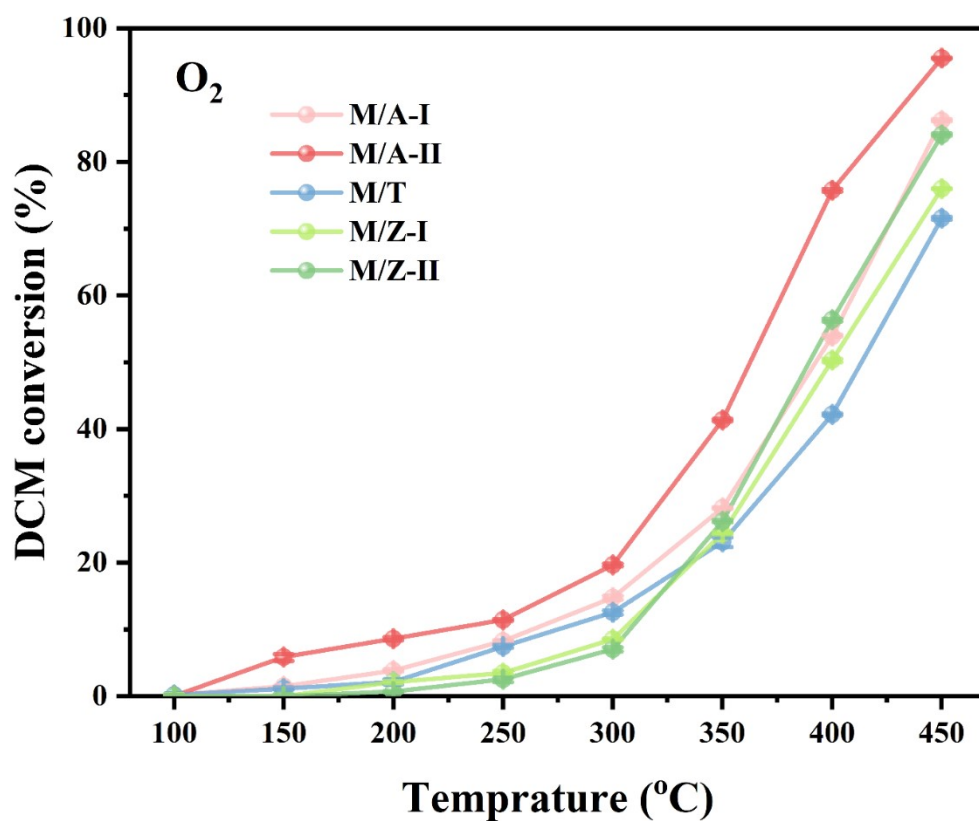

**Fig. S1.** DCM conversion curves at 100 ~ 450 °C of O<sub>2</sub> catalytic oxidation over the samples.

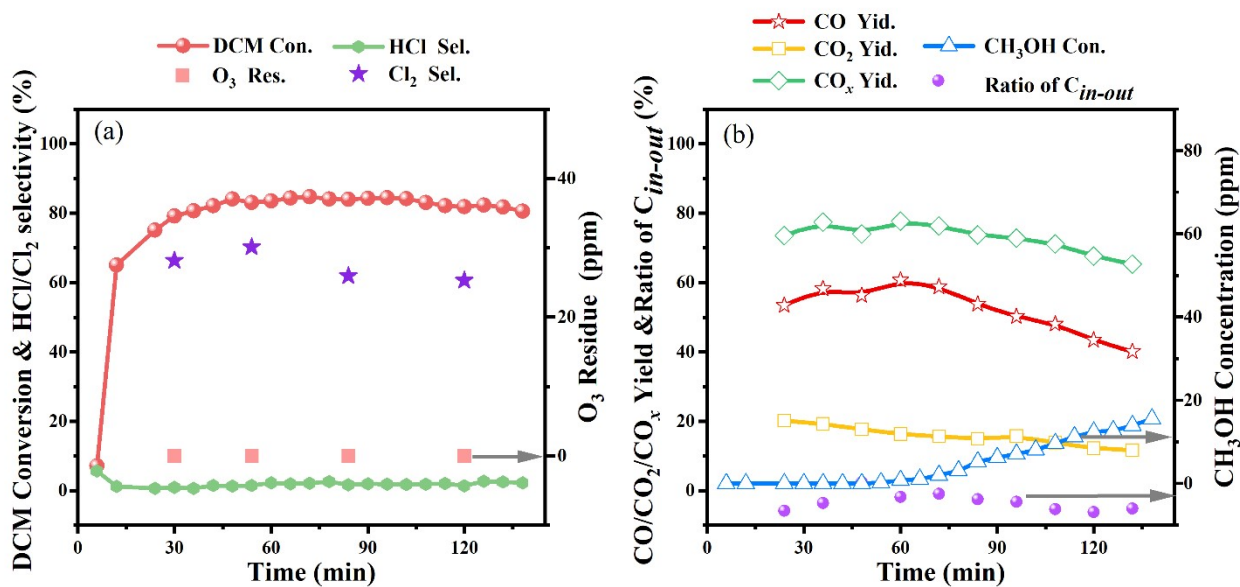

**Fig. S2.** Stability performance of the M/A-II with O<sub>3</sub>/DCM=6 at 20 °C. (conditions: DCM initial concentration = 100 ppm; GHSV ≈ 30000 h<sup>-1</sup>).

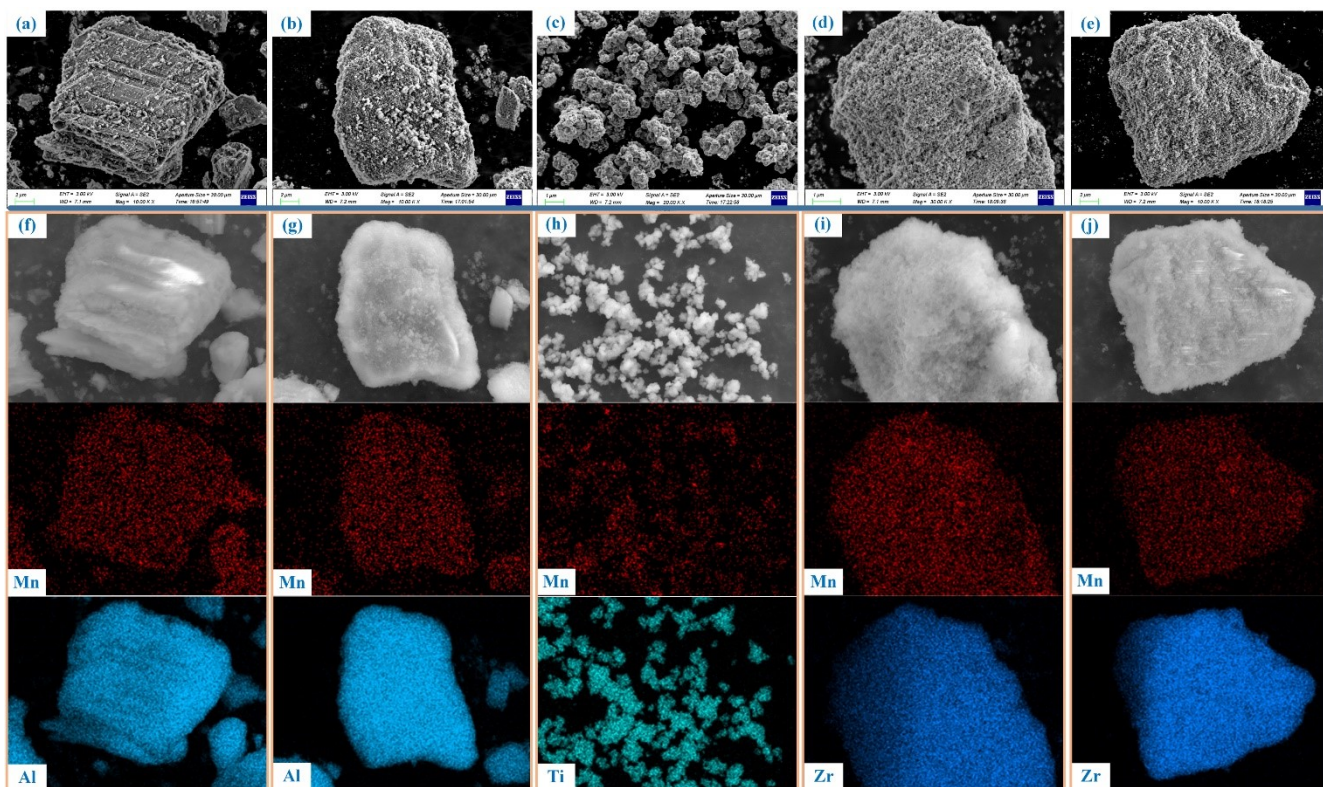

**Fig. S3.** (a) ~ (e) SEM and (f) ~ (j) EDS mapping images of all catalysts. (a) ~ (e) and (f) ~ (j) correspond to M/A-I, M/A-II, M/T, M/Z-I and M/Z-II in order, respectively.

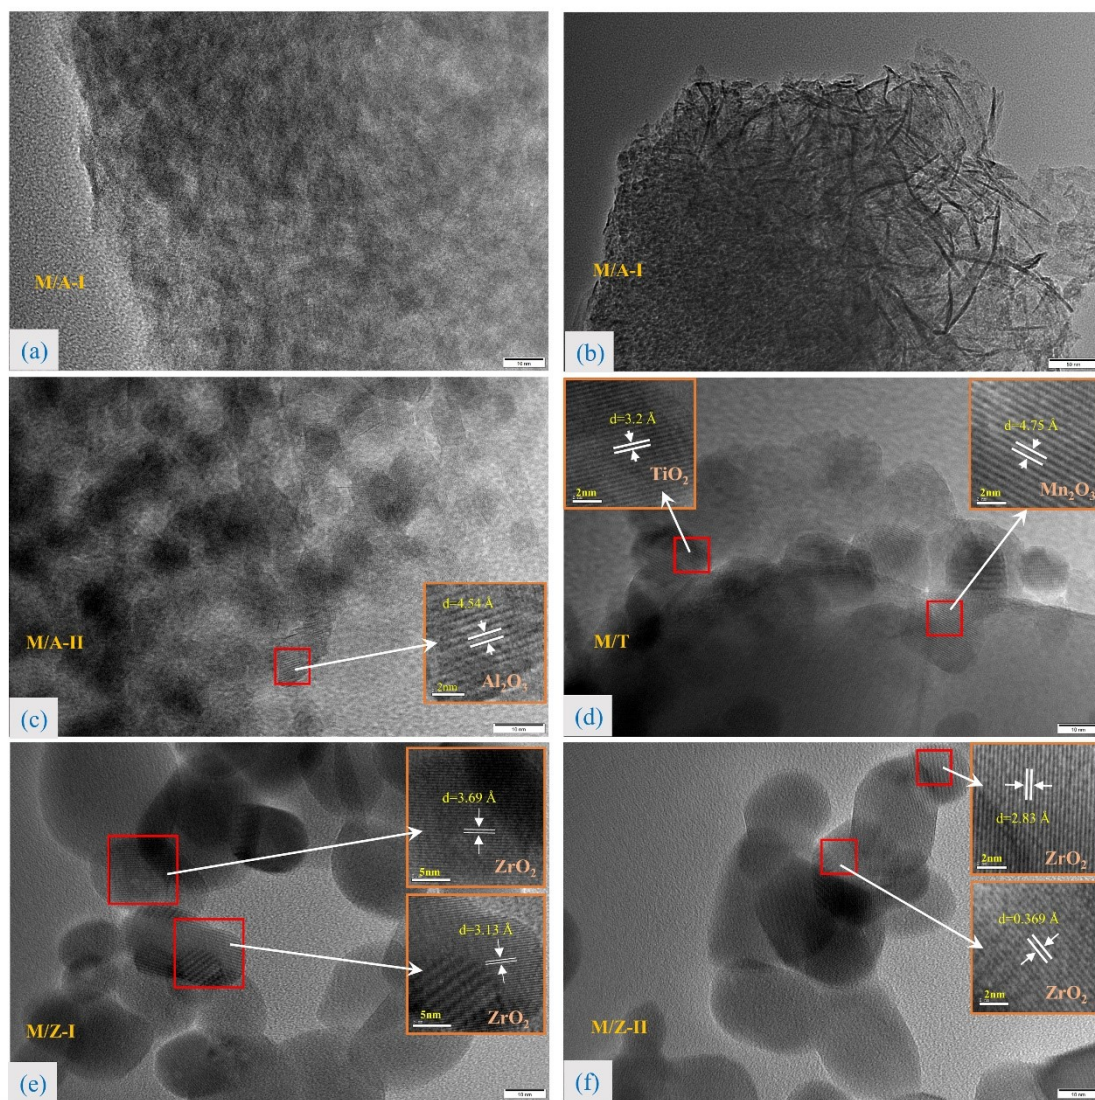

**Fig. S4.** TEM images of all catalysts. (a) and (b) correspond to M/A-I, and (c) ~ (f) correspond to M/A-II, M/T, M/Z-I and M/Z-II, respectively. (Due to the lack of high photographic magnification, the M/A-I data can be roughly FFT measured to a lattice spacing of  $2.41 \text{ \AA}$ , which can correspond to the converted lattice spacing of PDF# 04-0877 for  $\text{Al}_2\text{O}_3$ )

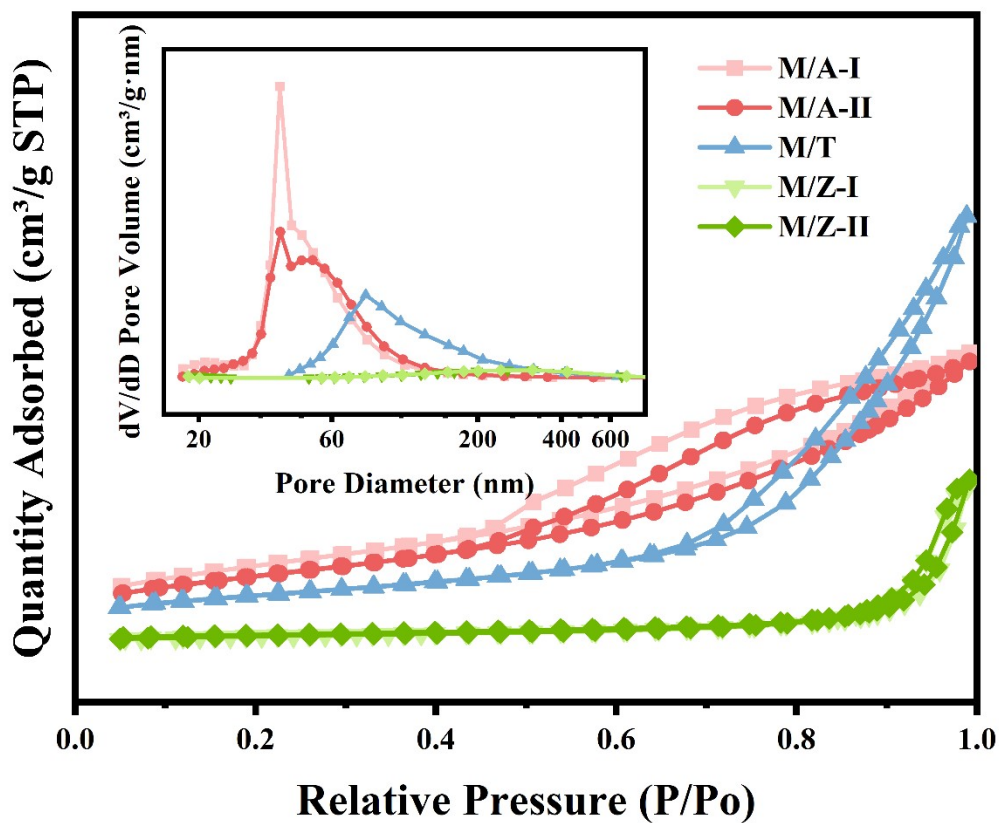

Fig. S5. N<sub>2</sub> adsorption and desorption isotherms and pore size distribution curves of Mn-loaded catalysts.

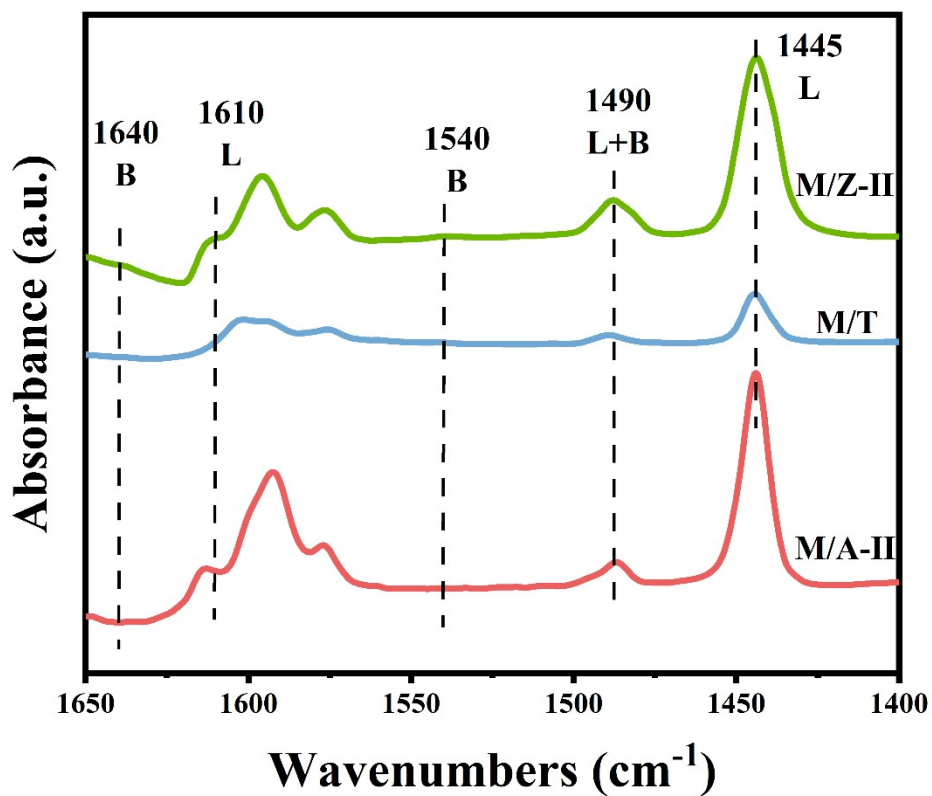

Fig. S6. Py-IR spectra of M/Z-II, M/T and M/A-II.

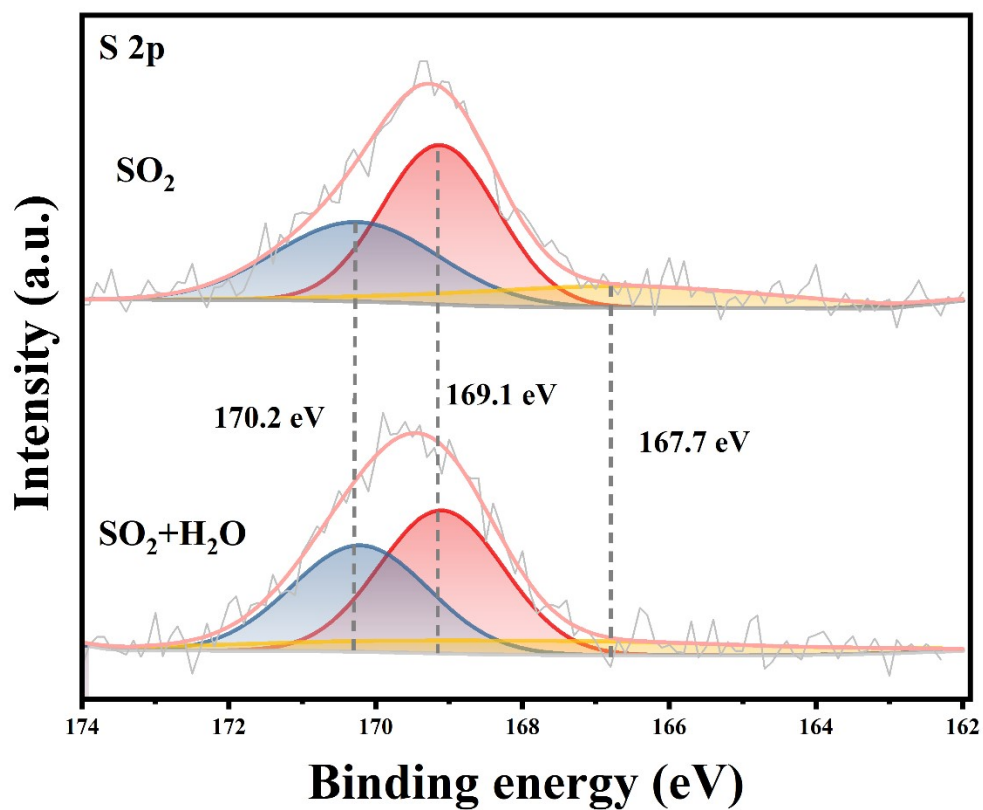

**Fig. S7.** XPS spectrum of S 2p after SO<sub>2</sub> single and both SO<sub>2</sub> and H<sub>2</sub>O effect.

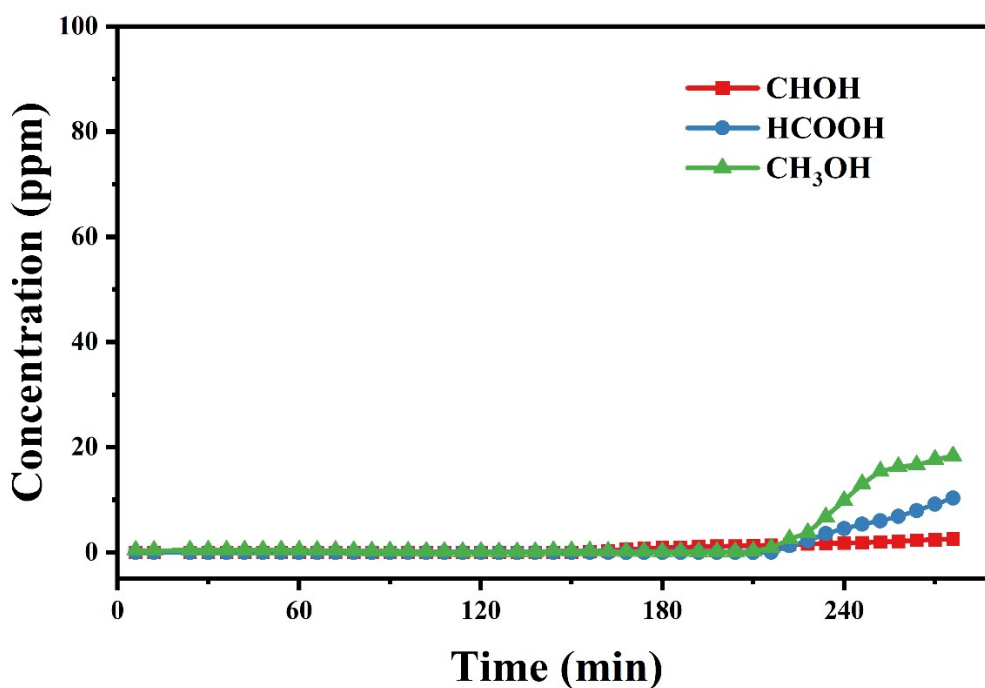

**Fig. S8.** Byproducts concentration of DCM ozone catalytic oxidation on M/A-II with the dynamic effects of SO<sub>2</sub>.

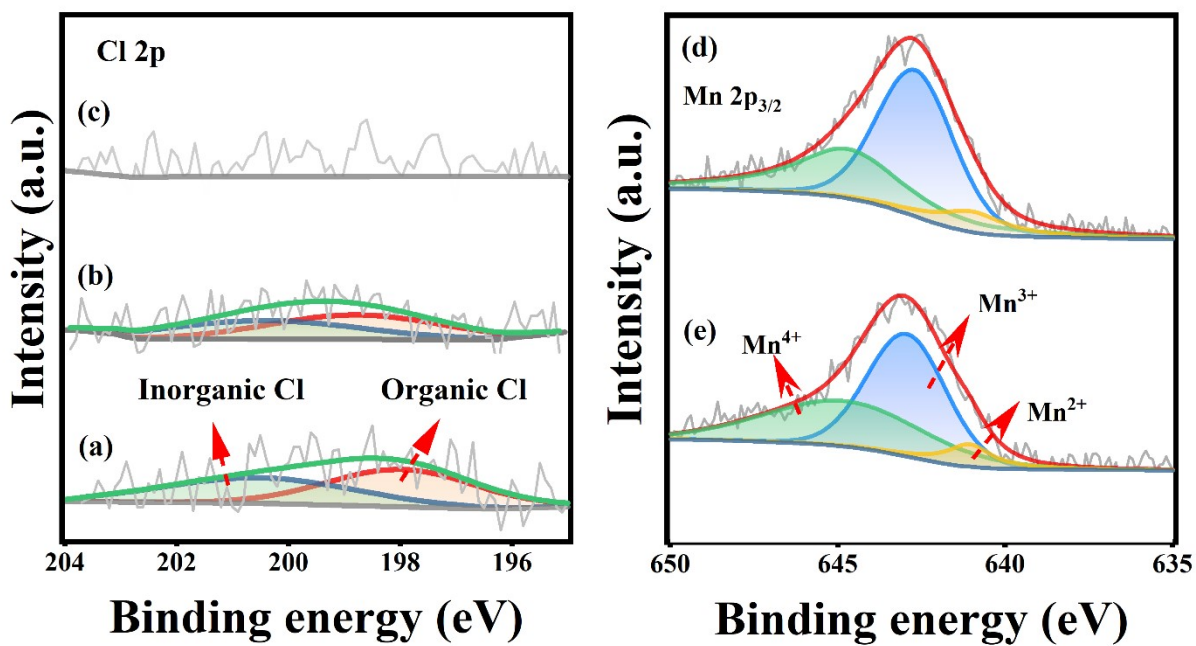

**Fig. S9.** XPS spectrum of Cl 2p after (a) 20 °C stability test (b) 120 °C stability test and (c) 120 °C H<sub>2</sub>O effect test; and the Mn 2p<sub>2/3</sub> after catalytic ozonation on the M/A-II with the effects of (d) SO<sub>2</sub> and (e) simultaneous presence of water vapor and SO<sub>2</sub>.

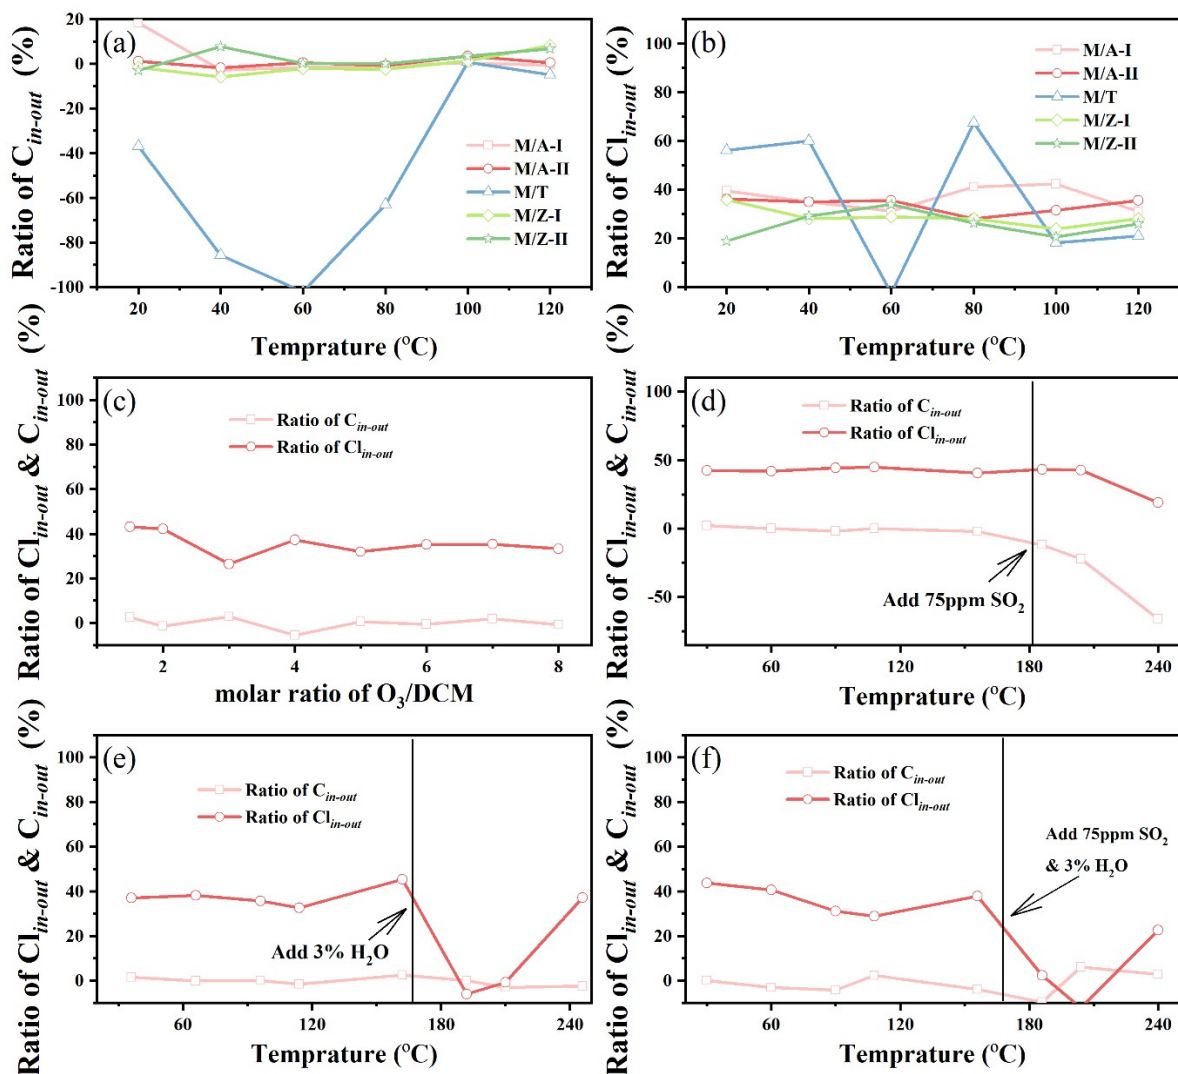

**Fig. S10.** Carbon/chlorine balance plots for all catalytic reactions in this study. (a) and (b) are the five catalysts carbon balance and chlorine balance from 20 ~ 120 °C reactions, respectively, corresponding to Fig. 2 (a) ~ (d) in the revised version; (c) is the reaction of changing the initial molar ratio of  $O_3/DCM$  at 120 °C on M/A-II, corresponding to Fig. 2 (e) ~ (f) in the revised version. Fig. 2 (e) ~ (f) in the revised version. (d) to (f) are the reactions at 120 °C on M/A-II when  $SO_2$ , water vapor, and both  $SO_2$  and water vapor are introduced.



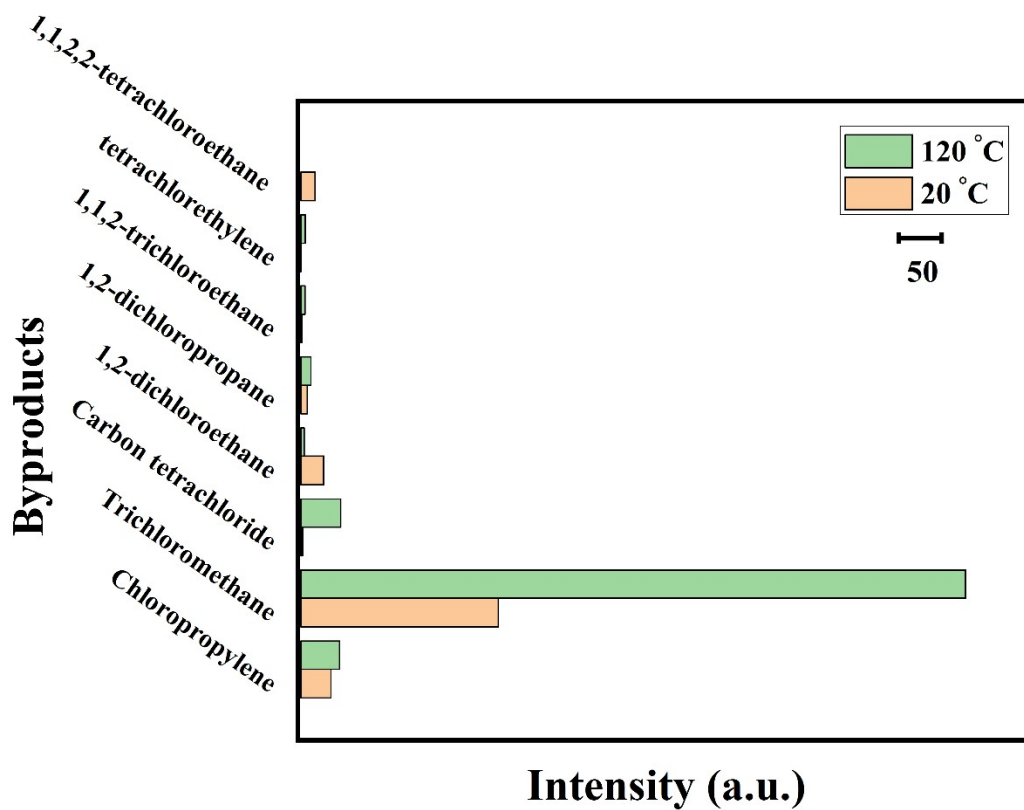

**Fig. S11.** By-products of catalytic ozonation of DCM at 20 °C and 120 °C on M/A-II measured by CG-MS after collection in adsorption tubes.

**Table S1**

Binding energy and species distribution of Mn 2p<sub>2/3</sub> for M/A-II in different reaction environments.

| Catalysts                                | Mn 2p <sub>2/3</sub>  |                       |                       |                          |                         |                         |
|------------------------------------------|-----------------------|-----------------------|-----------------------|--------------------------|-------------------------|-------------------------|
|                                          | Mn <sup>2+</sup> (eV) | Mn <sup>3+</sup> (eV) | Mn <sup>4+</sup> (eV) | Mn <sup>2+</sup> /Mn (%) | Mn <sup>3+</sup> /Mn(%) | Mn <sup>4+</sup> /Mn(%) |
| Fresh M/A-II                             | /                     | 642.68                | 644.43                | /                        | 69.84                   | 30.16                   |
| SO <sub>2</sub> M/A-II                   | 641.00                | 642.69                | 644.71                | 9.87                     | 60.03                   | 30.09                   |
| SO <sub>2</sub> +H <sub>2</sub> O M/A-II | 641.08                | 642.96                | 644.79                | 7.92                     | 59.36                   | 29.50                   |

**Table S2**

The specific information on the by-products of the exhaust gas detected by GC-MS after adsorption tube collection.

| No. | Molecular name            | Molecule formula                              | Molecular structure                                                                   |
|-----|---------------------------|-----------------------------------------------|---------------------------------------------------------------------------------------|
| 1   | Chloropropylene           | C <sub>3</sub> H <sub>5</sub> Cl              | 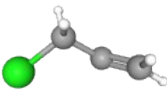   |
| 2   | Trichloromethane          | CHCl <sub>3</sub>                             |    |
| 3   | Carbon tetrachloride      | CCl <sub>4</sub>                              |    |
| 4   | 1,2-dichloroethane        | C <sub>2</sub> H <sub>4</sub> Cl <sub>2</sub> |    |
| 5   | 1,2-dichloropropane       | C <sub>3</sub> H <sub>6</sub> Cl <sub>2</sub> |    |
| 6   | 1,1,2-trichloroethane     | C <sub>2</sub> H <sub>3</sub> Cl <sub>3</sub> |   |
| 7   | Tetrachlorethylene        | C <sub>2</sub> Cl <sub>4</sub>                |  |
| 8   | 1,1,2,2-tetrachloroethane | C <sub>2</sub> H <sub>2</sub> Cl <sub>4</sub> |  |

According to **Fig. S11**, that all experiments have reached the carbon balance within 10% error range. For the chlorine balance, the visible chlorine balance only reaches 60 ~ 80% in the absence of water vapor. When a high concentration of water vapor was introduced, the value of Ratio of Cl<sub>in-out</sub> decreased to nearly zero and the visible chlorine balance was achieved. In addition, the carbon balance deviated from normal in **Fig. S11** (a) when reacting on M/T at 20 ~ 60 °C. One reason is that M/T has poor low temperature performance and cannot oxidize DCM to CO<sub>x</sub>, thus generating more byproducts CH<sub>3</sub>OH which may compete with DCM. The second reason is the higher boiling point of CH<sub>3</sub>OH, i.e., CH<sub>3</sub>OH (64.7 °C) > DCM (39.8 °C), which could stay on the surface of M/T and affect the carbon balance. Similarly, in **Fig. S11** (d), after the poisoning of M/A-II by the erosion of high concentration of SO<sub>2</sub>, more CH<sub>3</sub>OH production was detected at the same time. Therefore, it could be said that the poisoned M/A-II also had difficulty in resisting the CH<sub>3</sub>OH production and the carbon balance deviated from the normal.
